# Supplementary material
Source: publisher figshare collection journal article supplement (https://tandf.figshare.com/articles/dataset/_/28652382)
Supplement: Supplementary file 1 [file 1]

**Supplementary Figures**

**Figure 1 λmax spectra of Lurasidone hydrochloride**


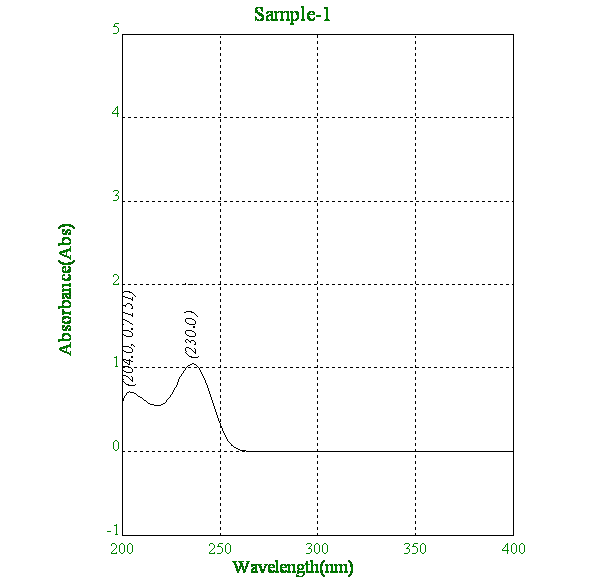


**Figure 2: FT-IR Spectrum of LH**

**
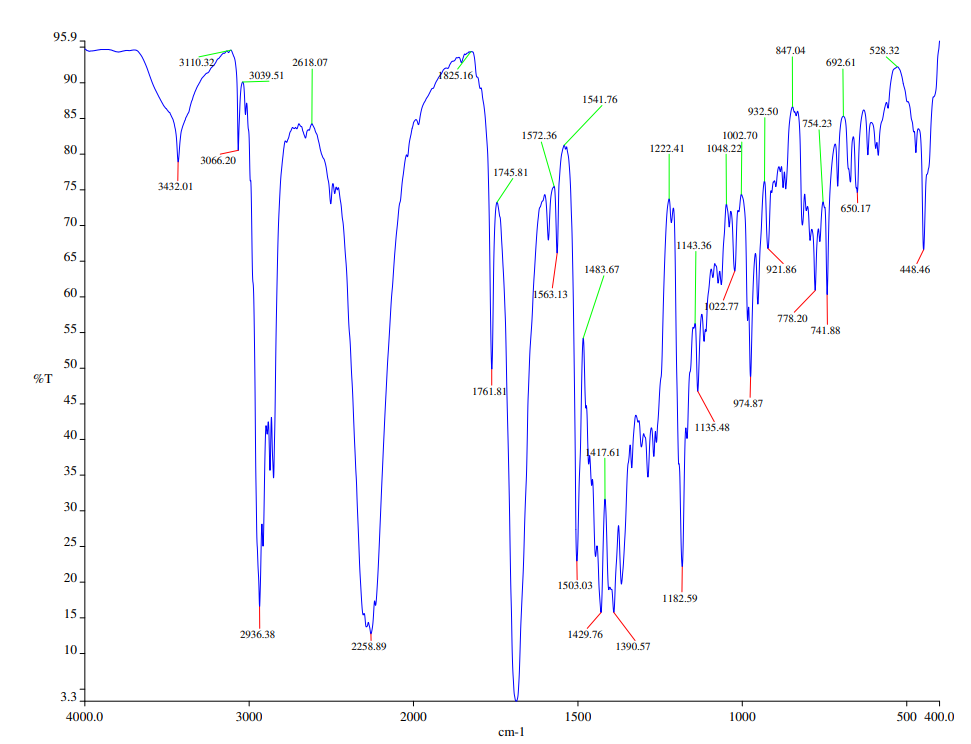
**

**Figure 3: DSC thermograph of Pure LH**


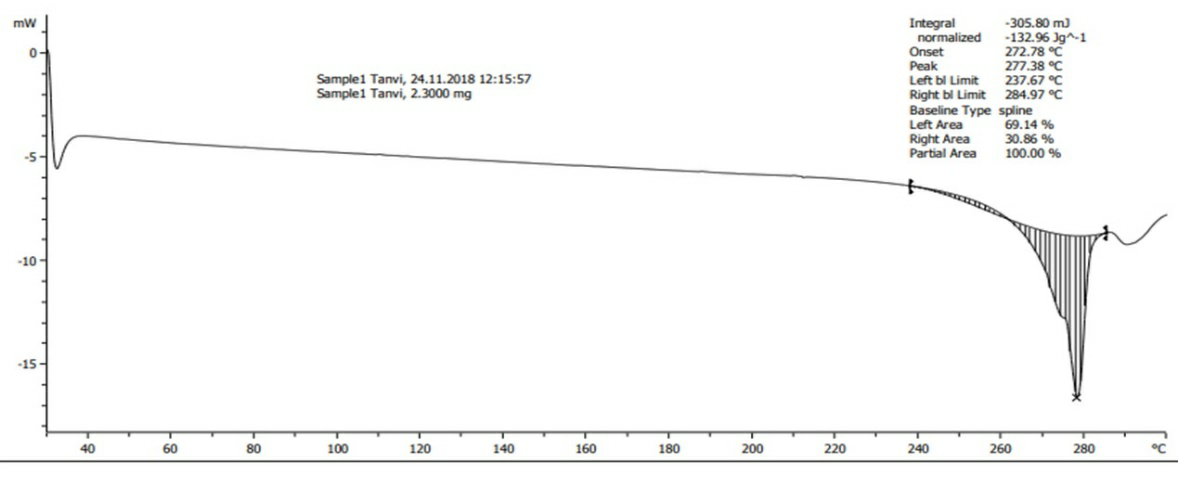


**Figure 4a: IR spectra of LH and excipients at Day 1**


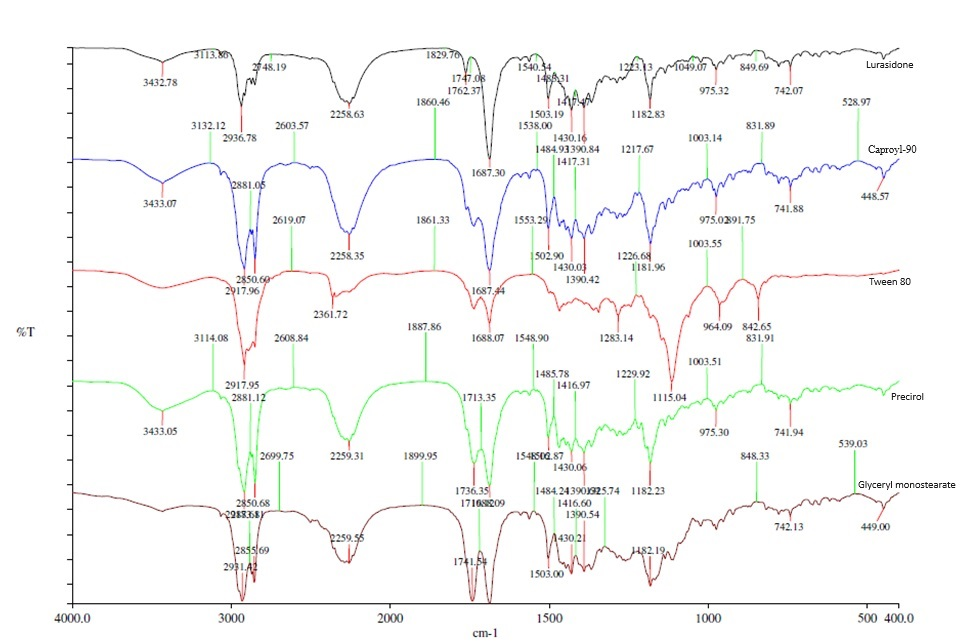


**Figure 4b: IR spectra of LH and excipients at Day 28**

**
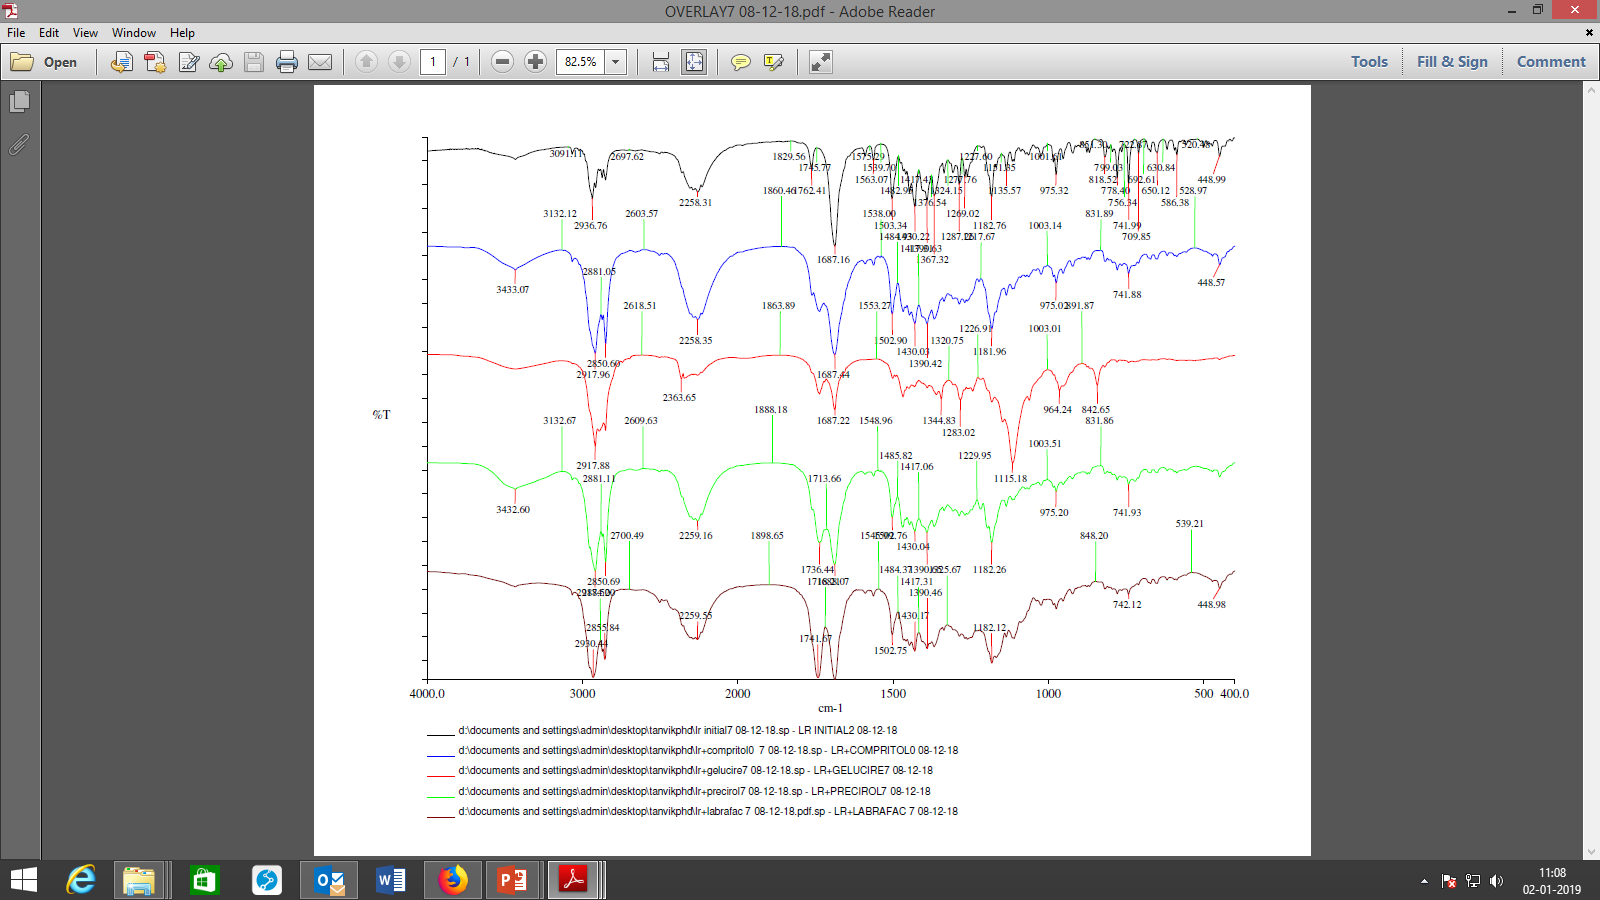
**

**Figure 5 : Compiled DSC Thermograms of LH and Excipients**


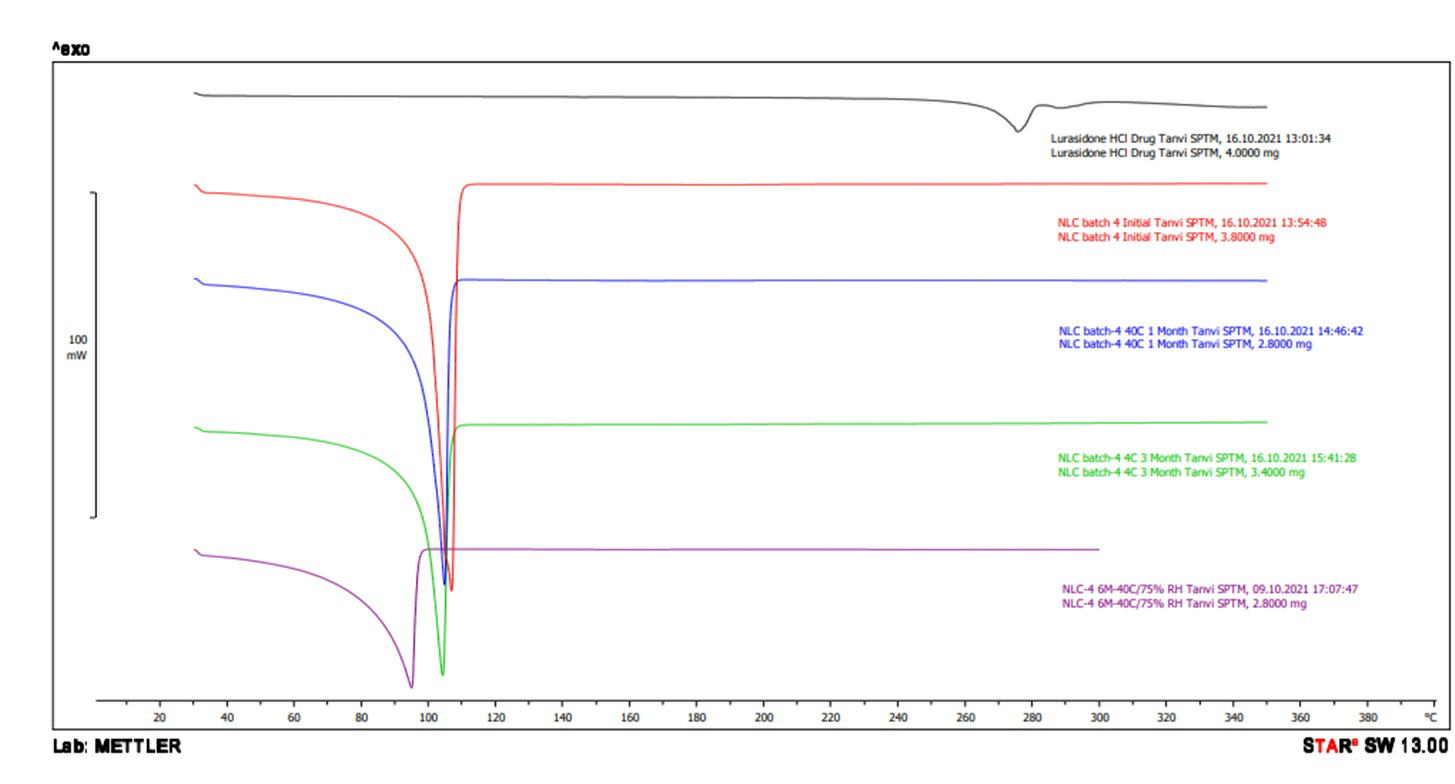


**Figure 6: Optimized LH-NLC formulation under SEM.**

**
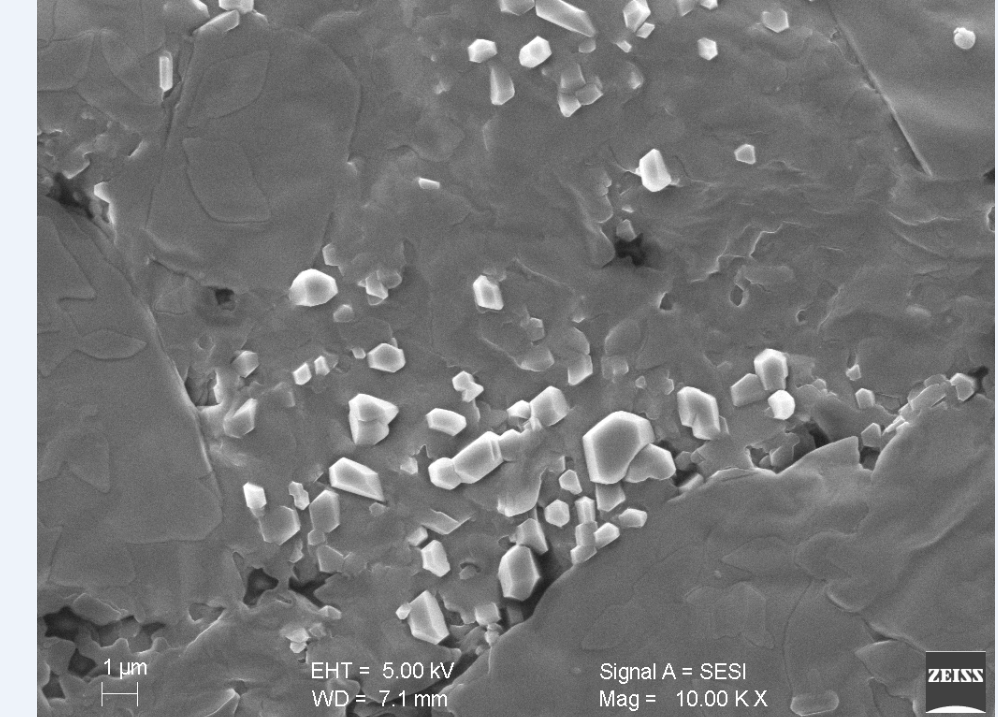
**

**Figure 7a: Invitro drug release Kinetics Zero order for LH-NLC and LH suspension**


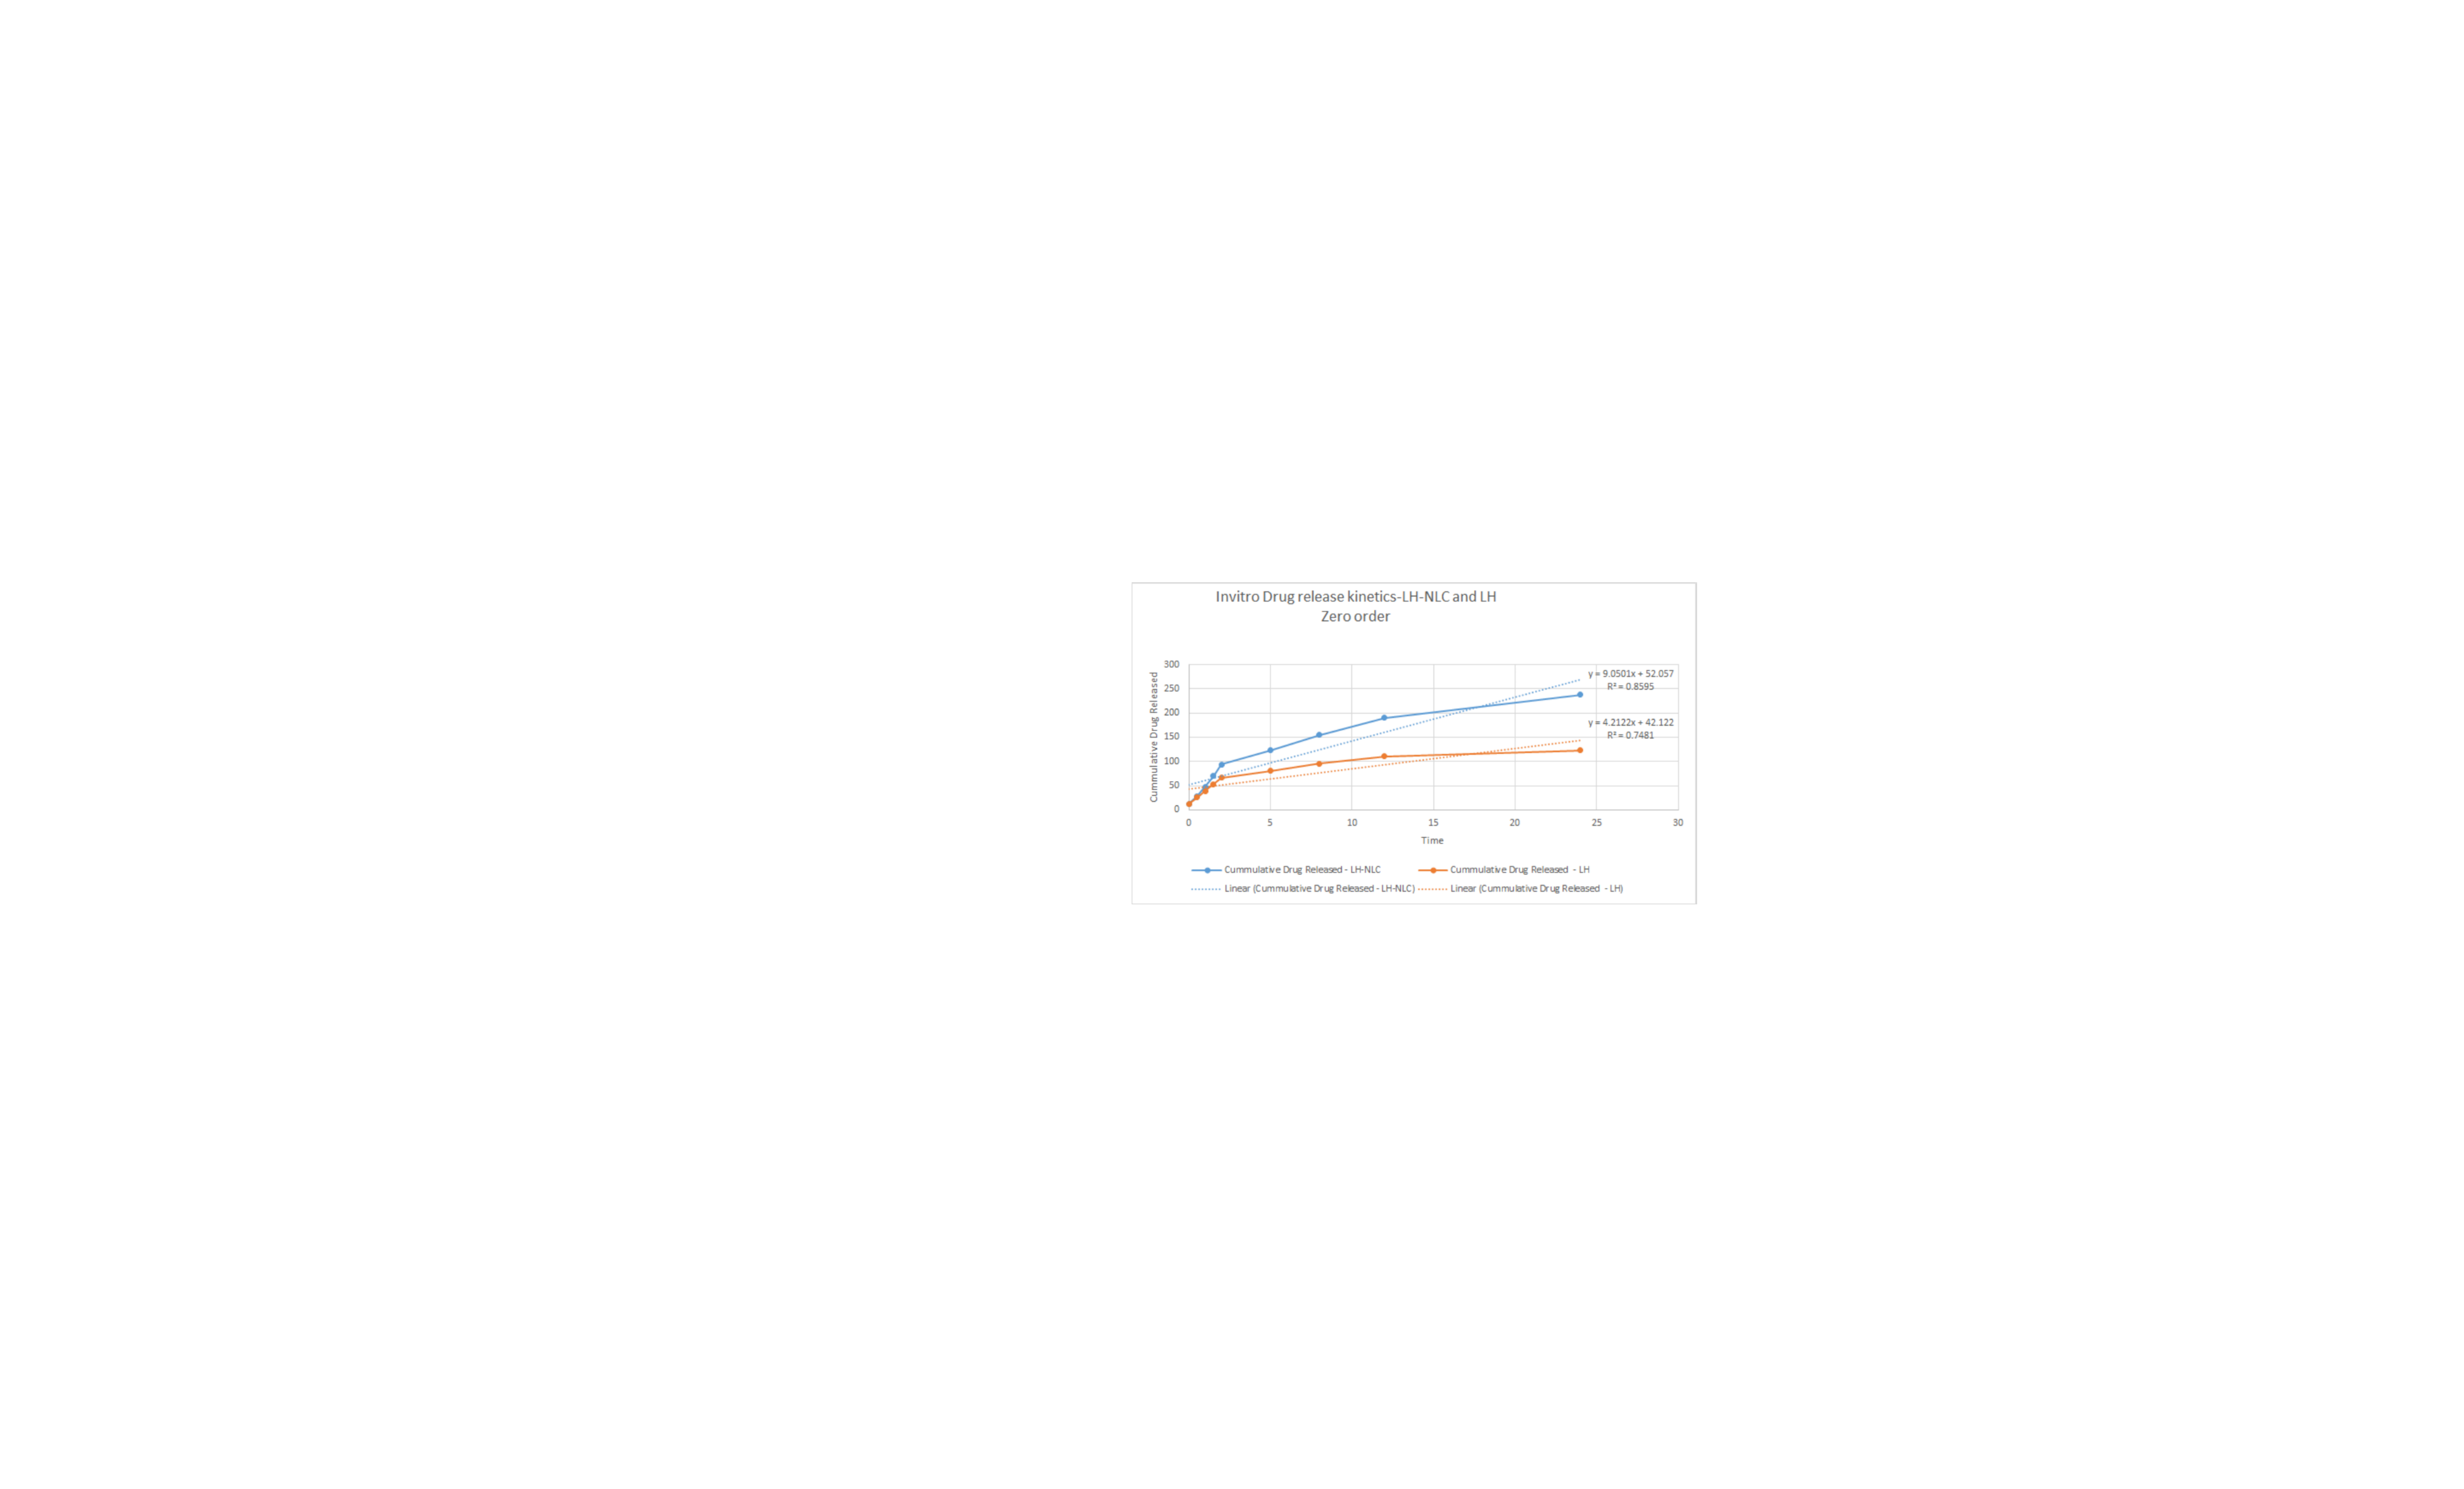


**Figure 7b: Invitro drug release Kinetics first order for LH-NLC and LH suspension**


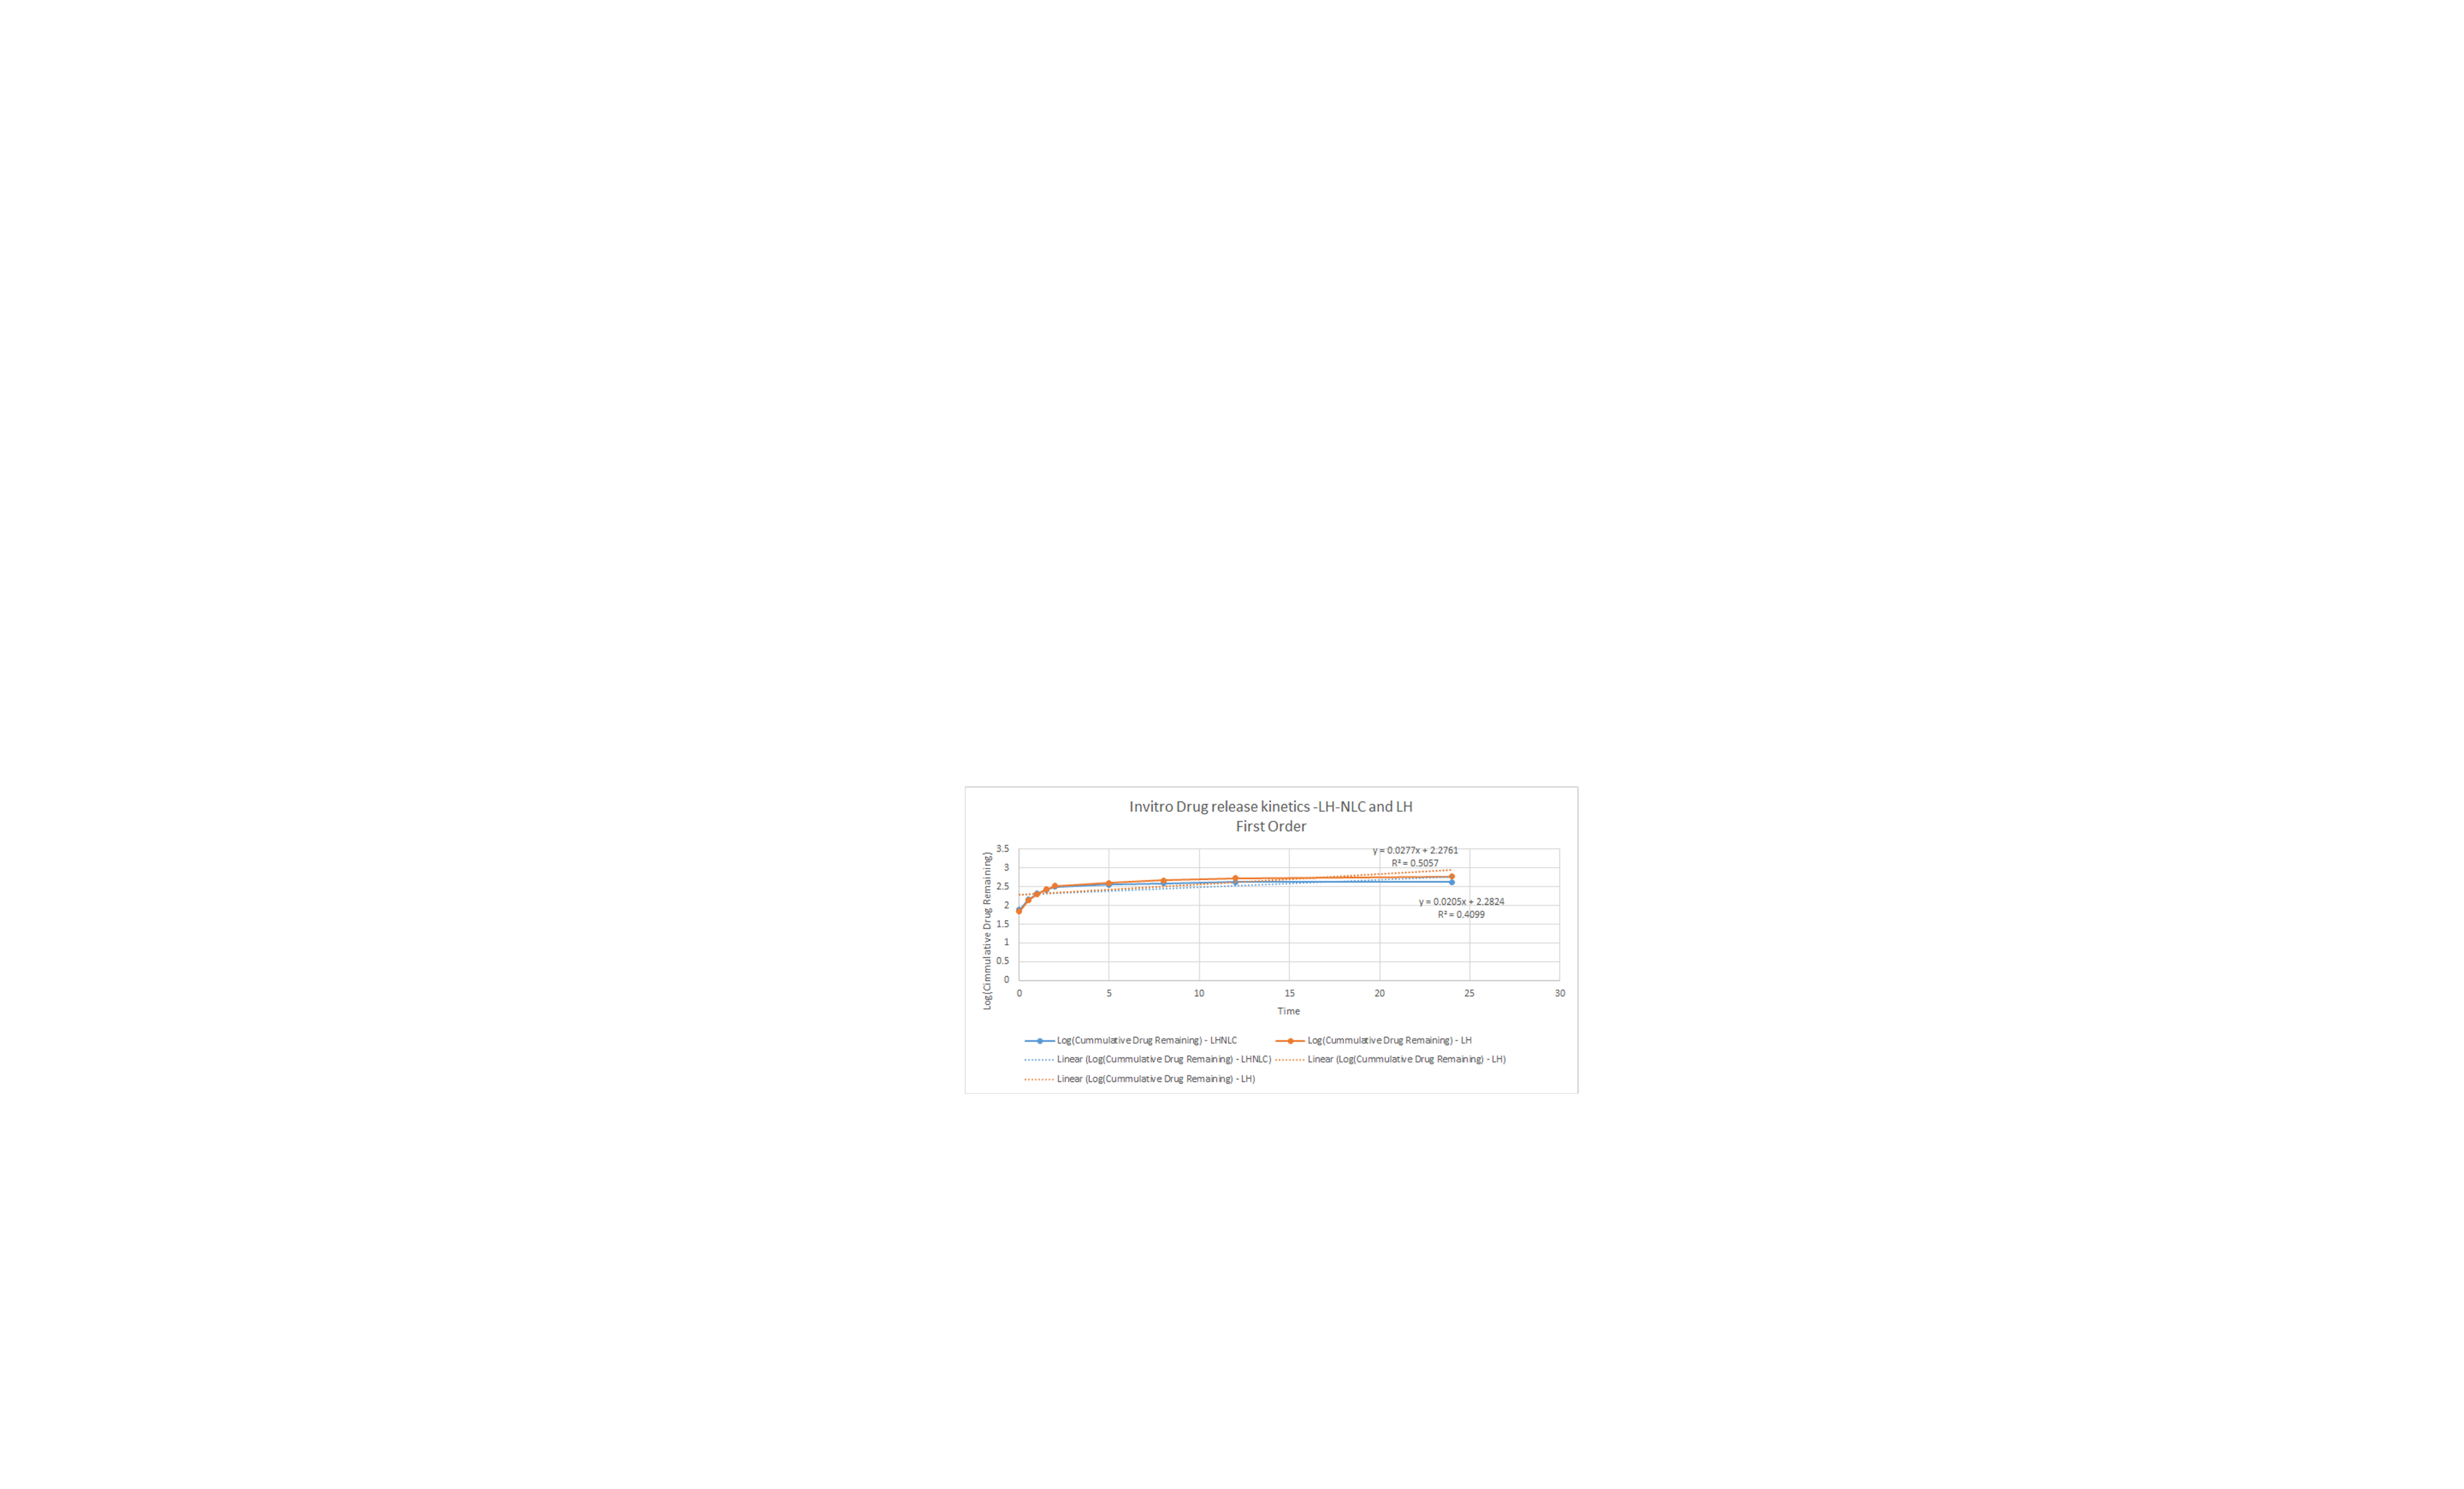


**Figure 7c: Invitro drug release Kinetics Higuchi model for LH-NLC and LH suspension**


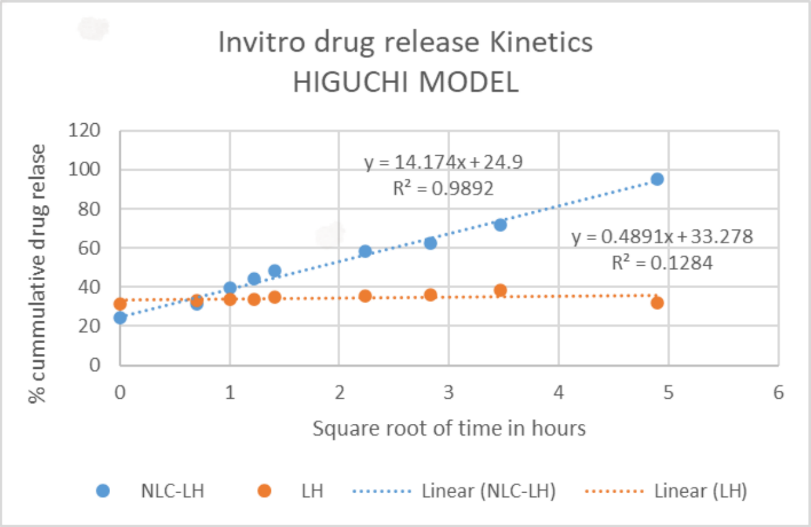


**Figure 7d: Invitro drug release Kinetics Koresemeyer Peppas for LH-NLC and LH suspension**


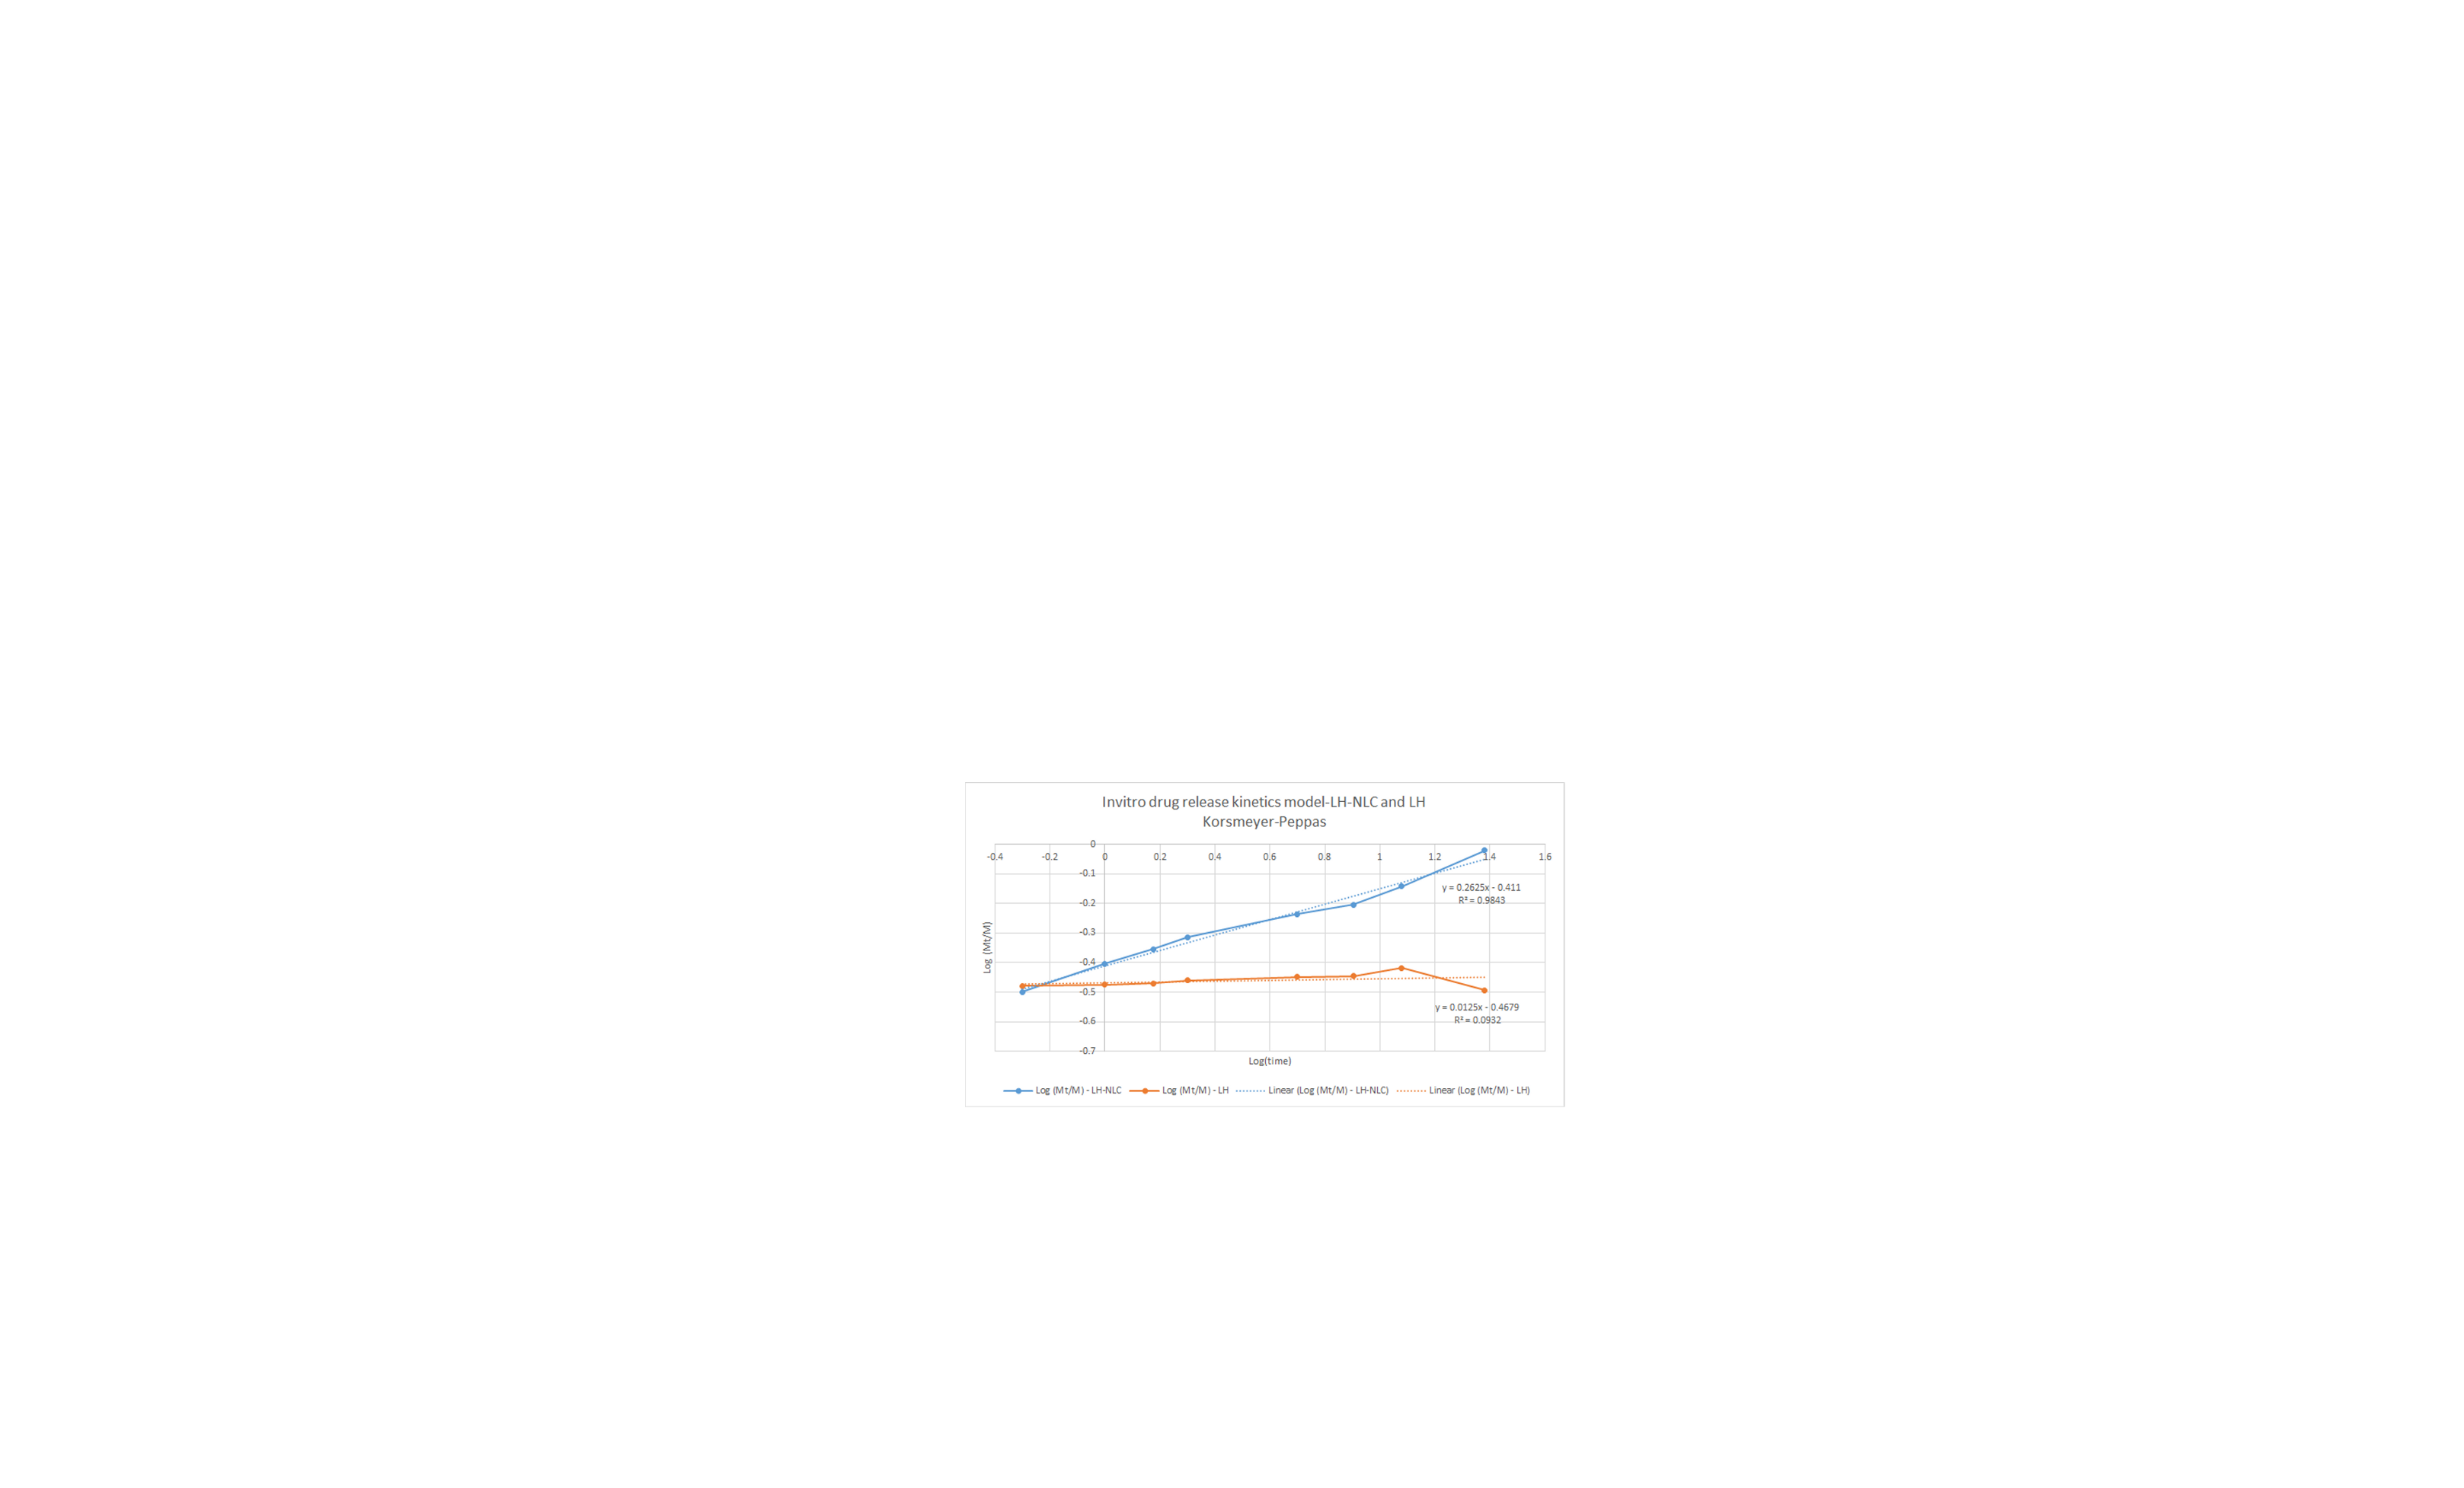


**Figure 7e: Invitro drug release Kinetics Hixon-crowel for LH-NLC and LH suspension**


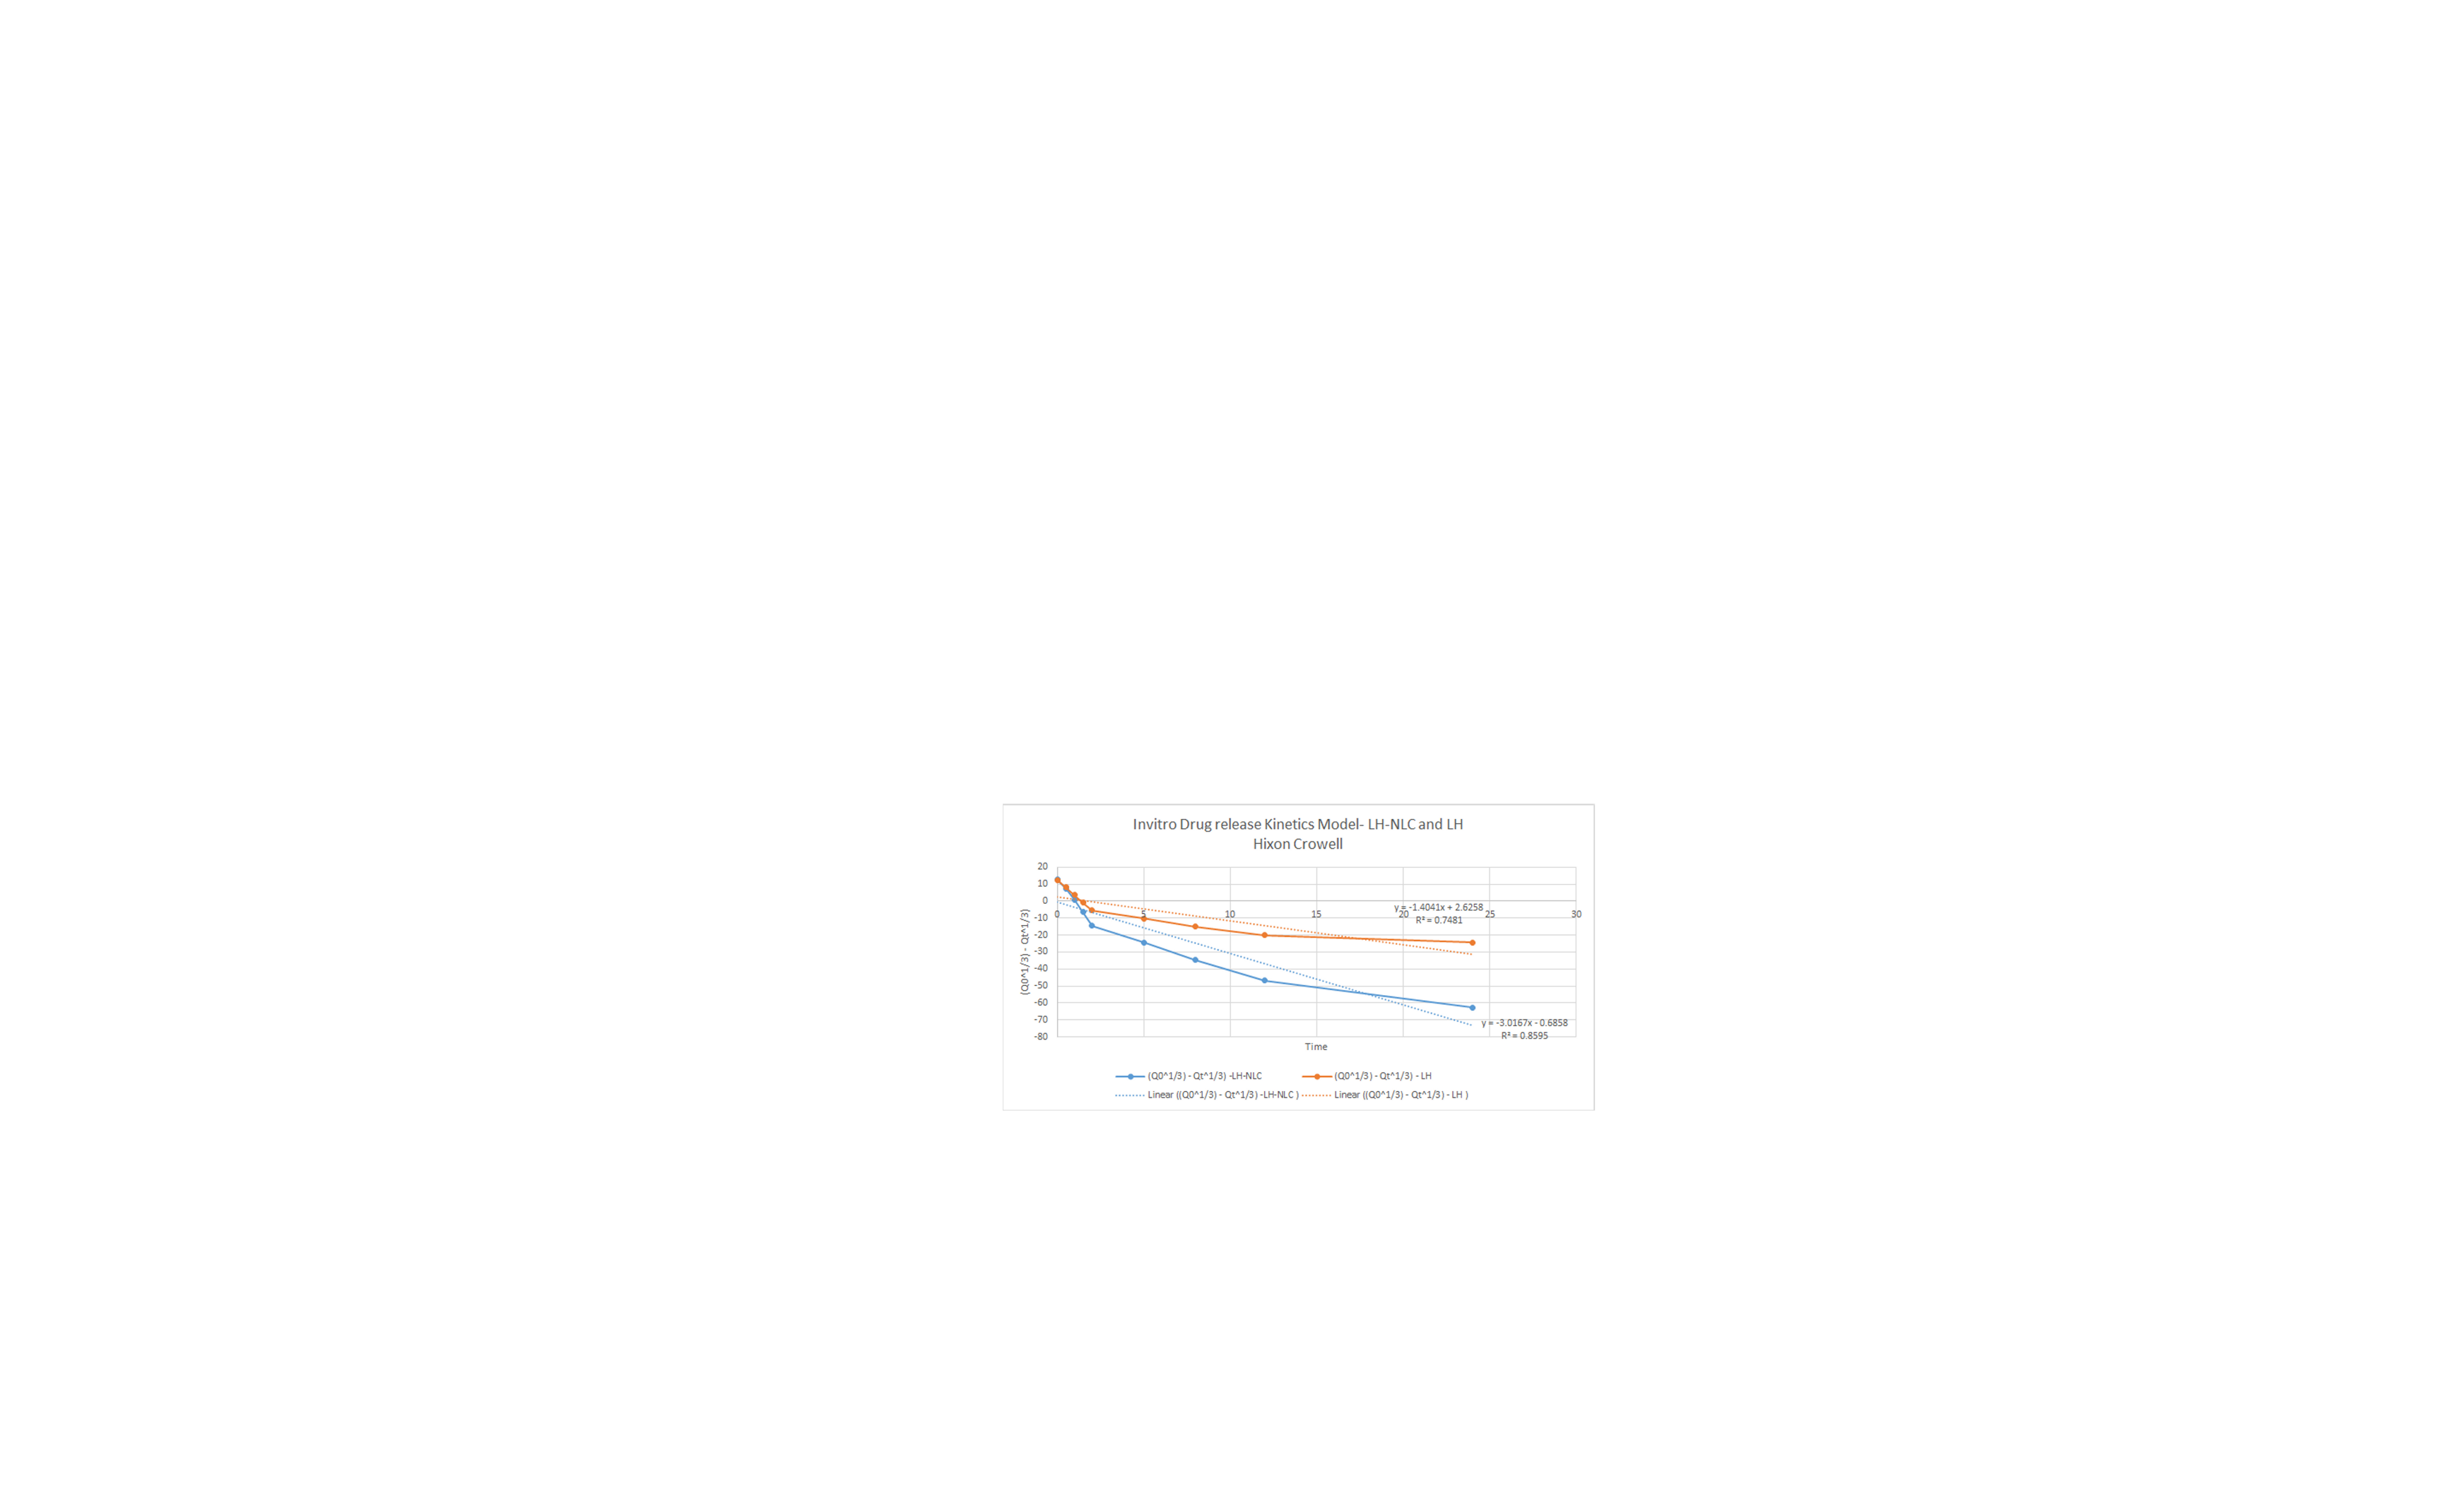


**
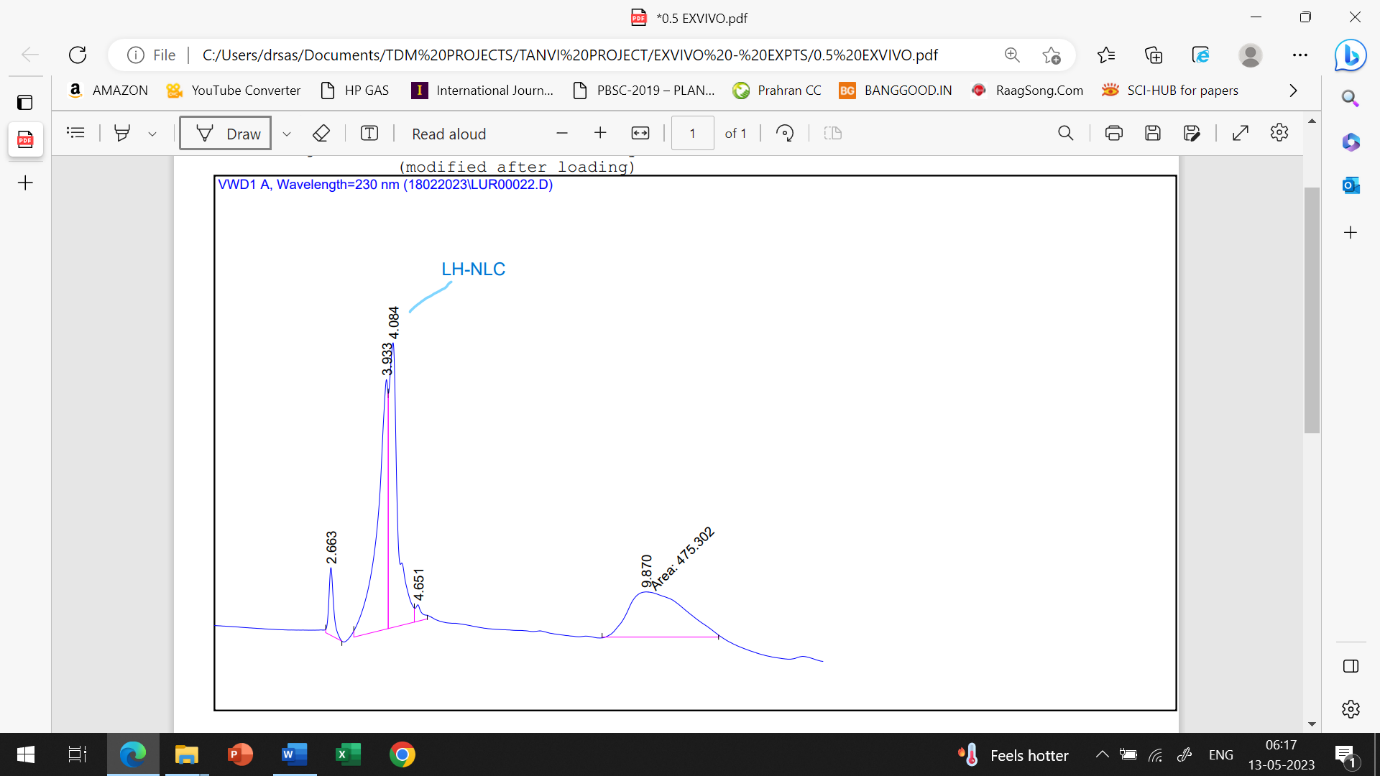
Figure 8: Representative RP-HPLC Chromatogram of Ex Vivo experiment, for sample withdrawn at 0.5 Hr, showing distinct peak at RT of 4.08 min**

**Figure 9 Results of *Ex vivo* permeation studies for LH-NLC and drug suspension (Flux for LH-NLC-0.1005 µg/cm2/hour and drug suspension- 0.0493 µg/cm2/hour)**

**Figure 10: FT IR Overlay of LH-NLC with Lurasidone**

**
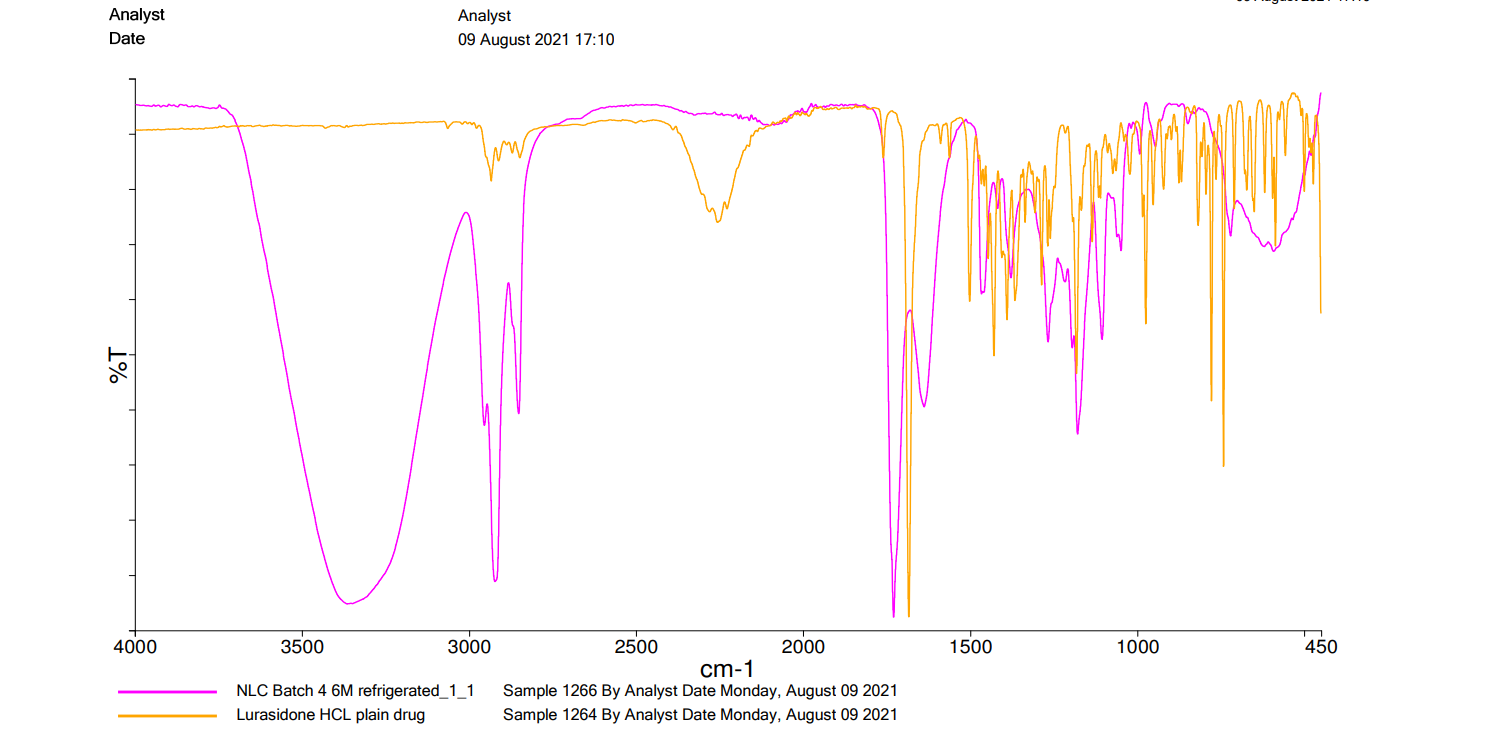
**
